# Supplementary material
Source: Springer Nature journal article supplement (https://www.springermedizin.de/resource/supplementary/12913_2006_432_MOESM2_ESM.pdf/9535196)
Supplement: MOESM2 [file 9535196]

## Additional File 2 Studies that directly correlate processes of care with risk-adjusted mortality

| First author and date of publication | Setting of study                                                                                                                 | Nature or medical condition(s) of patients                                             | How quality of care was measured                                                                                                                                                                                                     | How risk-adjusted mortality was measured                                                                            | Principal findings                                                                                                                                                                                                                                                                                                                                                                                                                          | Nature of relationship                                                                      | Additional comments                                                                                                                                                                                                                                                                   |
|--------------------------------------|----------------------------------------------------------------------------------------------------------------------------------|----------------------------------------------------------------------------------------|--------------------------------------------------------------------------------------------------------------------------------------------------------------------------------------------------------------------------------------|---------------------------------------------------------------------------------------------------------------------|---------------------------------------------------------------------------------------------------------------------------------------------------------------------------------------------------------------------------------------------------------------------------------------------------------------------------------------------------------------------------------------------------------------------------------------------|---------------------------------------------------------------------------------------------|---------------------------------------------------------------------------------------------------------------------------------------------------------------------------------------------------------------------------------------------------------------------------------------|
| Best [38] 1994                       | Eight Veteran Affairs (VA) hospitals with high mortality and eight with low mortality rates (part of the VA surgical risk study) | Pulmonary disease, gastrointestinal disease, cancer, heart disease, infectious disease | 111 deceased patients from high-mortality outliers matched with 111 deceased patients from low-mortality hospitals. Independent reviewers compared quality of care between pairs of patients                                         | 30 day mortality; calculated from administrative data, predictive power assessed by c-statistic                     | No differences between high and low outlier hospitals on preventability of death, and quality of care judged better in the higher-mortality hospitals almost as often as better in the lower mortality hospitals. Results not analysed by disease category.                                                                                                                                                                                 | None                                                                                        | Unable to distinguish between patients with condition at admission and those who developed condition during admission. Investigators blinded to hospital mortality status.                                                                                                            |
| Bulger [39] 2002                     | 34 university hospitals in the US with trauma units                                                                              | 640 adult patients with a head injury and broken arm or leg                            | Use of prehospital intubation, ICP monitoring, osmotic agents, hyperventilation and CT scan use                                                                                                                                      | In-hospital mortality; calculated from clinical data, predictive power not assessed                                 | Hospitals that undertook more aggressive management had a significantly lower mortality than hospitals that were less aggressive                                                                                                                                                                                                                                                                                                            | Intuitive                                                                                   |                                                                                                                                                                                                                                                                                       |
| Curtis [40] 1997                     | Two US hospitals                                                                                                                 | 345 HIV-positive patients with PCP                                                     | Timeliness of anti-Pneumocystis therapy; use of steroids; diagnosis confirmed by bronchoscopy; use of ICU                                                                                                                            | In-hospital mortality; calculated from clinical data, predictive power not assessed                                 | Survival not significantly different despite large differences in the rates of diagnostic bronchoscopy and ICU. Differences in use of steroids and antibiotics were not significant.                                                                                                                                                                                                                                                        | None                                                                                        |                                                                                                                                                                                                                                                                                       |
| Dubois [41] 1987                     | US hospitals: six high-mortality outliers; six low-mortality outliers                                                            | 378 patients (both alive and who died) admitted with stroke, AMI or pneumonia          | (1) Explicit casenote review (2) Implicit casenote review to judge preventability of death                                                                                                                                           | In-hospital mortality; calculated from clinical data, predictive power not assessed                                 | Explicit review: no significant differences between high and low mortality hospitals; implicit review: in high-mortality outliers, significantly more preventable deaths from pneumonia but not stroke or AMI                                                                                                                                                                                                                               | Explicit: none<br>Implicit: intuitive for pneumonia, none for others                        | Poor inter-rater reliability; Mortality rates of whole hospitals, not specific conditions; Some physician reviewers were blinded; not clear whether all were                                                                                                                          |
| Freeman [42] 2002                    | Nine hospitals in England in 1997                                                                                                | 898 patients aged over 60 years with hip fracture                                      | Timing of surgery and mobilisation, prevention of thromboembolism, geriatrician assessment, use of antibiotics, pressure sore risk assessment                                                                                        | 90-day mortality; calculated from clinical data, predictive power not assessed                                      | Significant differences between processes in different hospitals but little variation in outcomes. Comparing 1992 and 1997 [59], some hospitals improved their care whilst others deteriorated. The mortality of the hospital which in 1992 was lower than the others and had better overall care, was no better than the other hospitals by 1997.                                                                                          | None                                                                                        | Follow-up to Todd [59]                                                                                                                                                                                                                                                                |
| Gibbs [43] 2001                      | Surgical departments in the three highest mortality and five lowest mortality of 44 VA hospitals                                 | 739 surgical patients from the VA Surgical Risk Study                                  | Randomly sampled case notes from high and low mortality outlying hospitals; assessing quality of care by (1) structured chart review and (2) in patients who died, review by independent surgeon to estimate preventability of death | 30-day mortality; calculated from clinical data, predictive power assessed by c-statistic                           | Quality of care scores generally slightly lower in high-mortality hospitals, but differences not generally significant. Mean quality of care ratings lower for deceased patients than survivors. Limited evidence that lower mortality associated with better quality of anaesthetic care. Better orthopaedic care associated with higher mortality. Patients at low risk of dying who nevertheless died more likely to have had poor care. | Mixture of intuitive and paradoxical                                                        | Moderate inter-rater reliability; not clear whether investigators were blinded to hospital mortality status                                                                                                                                                                           |
| Goldman [44] 1994                    | 44 VA hospitals with significantly higher overall or departmental mortality                                                      | 2,398 deceased acute medical and surgical patients                                     | Peer review of records of dead patients for appropriateness of care and inevitability of death                                                                                                                                       | 30-day mortality post-surgery or post-admission; calculated from administrative data, predictive power not assessed | Commonest problem among avoidable deaths was not receiving, or delayed, treatment. Psychiatric units had a significantly higher proportion of avoidable deaths, and proportion with excessive mortality significantly higher than proportion of other hospitals                                                                                                                                                                             | Intuitive                                                                                   | Began with the 44 highest mortality-rate hospitals rather than comparing high and low-mortality hospitals<br>Poor inter-rater reliability;<br>No mention of blinding to mortality                                                                                                     |
| Hannan [45] 1991                     | 28 New York State hospitals                                                                                                      | 7,596 patients who underwent open heart surgical procedures                            | Chart reviews of deceased patients                                                                                                                                                                                                   | In-hospital mortality; calculated from clinical data, goodness-of-fit assessed                                      | Rate of quality problems higher in deceased patients from high mortality outliers than low outliers                                                                                                                                                                                                                                                                                                                                         | Intuitive                                                                                   | Only 63 records of deceased patients actually examined; seven records unobtainable. Deaths in one hospital not examined as surgery already suspended. Investigators blinded to mortality                                                                                              |
| Hartz [46] 1993                      | 4,132 US hospitals (Health Care Financing Administration HCFA study)                                                             | 2,035,128 Medicare patients in HCFA study                                              | (1) Hospitals ranked in order of peer review organisations' (PROs) problem rates (2) American Hospitals Association survey                                                                                                           | 30-day mortality; calculated from administrative data, predicted mortality similar to actual mortality              | Average within-state Spearman correlation coefficient between problem rate and adjusted mortality rate 0.19 (range -0.32 to 0.29). Similar hospitals had higher correlation coefficients. Significant relationship in 14 states                                                                                                                                                                                                             | Predominantly intuitive, though no relationship in some states, paradoxical in a few states | PROs in different states measured quality inconsistently and frequency of quality problems not necessarily correlated with severity of problems. Aggregating at the level of US states may be too coarse for meaningful results. Paper omitted to present results of hospital survey. |
| Lowrie [47] 2001                     | 394-498 US haemodialysis units                                                                                                   | Renal dialysis patients                                                                | Proportion of patients in each unit not conforming to three process indicators (haematocrit, urea reduction ratio, albumin).                                                                                                         | Standardised mortality ratios (SMR) from administrative data, evaluated by receiver-operating curves (ROC)          | Weak correlation between SMR and variance from guidelines for all three; improvements in indicators unlikely to significantly improve SMR.                                                                                                                                                                                                                                                                                                  | Intuitive                                                                                   | Study didn't assess what units were doing to attain process measures;<br>SMR inappropriate for multiple comparisons                                                                                                                                                                   |
| Matsui [48] 2001                     | Four tertiary teaching hospitals in Japan                                                                                        | 482 AMI patients                                                                       | Chart review of a wide range of processes                                                                                                                                                                                            | In-hospital mortality; calculated from clinical data, predictive power not assessed                                 | Similar use of thrombolysis and pacing in all hospitals; wide differences in rates of other procedures and interventions but only one hospital had significantly elevated mortality which was not explained by measured processes.                                                                                                                                                                                                          | None                                                                                        | The hospital with the higher mortality may have had sicker patients as not all available data was used to risk-adjust. Chart review preceded establishment of mortality so blinding unnecessary                                                                                       |
| McNaughton [49] 2003                 | Three hospitals in New Zealand                                                                                                   | 181 stroke patients                                                                    | Adherence to Royal College of Physicians Stroke Audit Package processes of care                                                                                                                                                      | 12-month mortality; calculated from clinical data                                                                   | Hospital with poorest process score had lowest mortality; hospital with best process score had highest mortality                                                                                                                                                                                                                                                                                                                            | Paradoxical                                                                                 | Very long follow-up;<br>23% of stroke patients not included                                                                                                                                                                                                                           |

| First author and date of publication               | Setting of study                                                                                                          | Nature or medical condition(s) of patients                                                                             | How quality of care was measured                                                                                                              | How risk-adjusted mortality was measured                                                           | Principal findings                                                                                                                                                                                                                                                                                                        | Nature of relationship                                       | Additional comments                                                                                                           |
|----------------------------------------------------|---------------------------------------------------------------------------------------------------------------------------|------------------------------------------------------------------------------------------------------------------------|-----------------------------------------------------------------------------------------------------------------------------------------------|----------------------------------------------------------------------------------------------------|---------------------------------------------------------------------------------------------------------------------------------------------------------------------------------------------------------------------------------------------------------------------------------------------------------------------------|--------------------------------------------------------------|-------------------------------------------------------------------------------------------------------------------------------|
| Meehan [50] 1995                                   | 6 Connecticut hospitals (two from each tertile of mortality)                                                              | 50 AMI patients in each hospital using HCFA data                                                                       | Percentage of eligible patients receiving thrombolysis, aspirin and $\beta$ -blocker                                                          | 30-day mortality; calculated from clinical data, predictive power assessed by kappa statistic      | Percentage thrombolysed did not vary between high and low-mortality hospitals; significantly higher percentage receiving aspirin or $\beta$ -blocker at discharge at low mortality hospitals                                                                                                                              | Aspirin or $\beta$ -blocker intuitive; thrombolysis none     |                                                                                                                               |
| Mohammed [51] 2005                                 | Seven hospitals in the West Midlands, UK                                                                                  | 702 stroke patients                                                                                                    | Intercollegiate stroke audit package standards                                                                                                | 30-day mortality; calculated from clinical data, predictive power not assessed                     | Widespread differences between hospitals in adherence to processes of care did not, with one exception, correlate with mortality                                                                                                                                                                                          | Intuitive or none (†)                                        | Effects largely the result of poor care in one hospital; missing data limited opportunity to risk adjust                      |
| Mozes [52] 1998                                    | 7 dialysis units in teaching hospitals in Israel                                                                          | 564 renal dialysis patients                                                                                            | Process variables modifiable by medical staff including intensity of dialysis, laboratory results, albumin, haematocrit, erythropoietin       | 1-year mortality; calculated from clinical data, predictive power not assessed                     | One hospital had elevated mortality, but variations in process indicators could not explain the variation in mortality.                                                                                                                                                                                                   | None                                                         |                                                                                                                               |
| Park [53] 1990                                     | 1,121 and 1,137 US hospitals (Health Care Financing Administration study)                                                 | 2,276 AMI and CCF patients                                                                                             | Explicit review of hospitals with significantly higher or lower than average mortality                                                        | In-hospital and 30-day mortality; calculated from clinical data, predictive power not assessed     | AMI: quality generally better in higher mortality hospitals. CCF: average quality-of-care score for patients treated in high-mortality hospitals poorer than average score for patients treated in low-mortality hospitals                                                                                                | Paradoxical for AMI, intuitive for CCF                       |                                                                                                                               |
| Peterson [54, 8] 2002                              | 64,775 patients in 350 US hospitals                                                                                       | AMI                                                                                                                    | % adherence to all relevant American College of Cardiologist/American Heart Association guidelines                                            | In-hospital mortality; calculated from clinical data, predictive power assessed by c-statistic     | Comparing quartiles of hospitals ranked by increasing adherence to ACC/AHA process indicators, strong correlation with improving mortality – a 10% improvement in a hospital's composite quality score was associated with a 10% lowering in their patient's odds for mortality                                           | Intuitive                                                    |                                                                                                                               |
| Romano [55, 56] (California Outcomes Project) 1996 | 228 Californian hospitals stratified by AMI mortality; ten selected from highest 5%, ten from lowest 5% and ten in middle | AMI patients from each of three strata of hospitals                                                                    | Use of aspirin, thrombolysis, $\beta$ blockers, heparin, angiography and revascularisation                                                    | In-hospital 30-day mortality; calculated from clinical data                                        | Percentages of patients receiving aspirin did not vary between strata; low-mortality hospitals more likely to prescribe aspirin early. Patients in low-mortality hospitals more likely to have heparin, angiography and revascularisation; patients in high-mortality hospitals more likely to receive $\beta$ -blockers. | Intuitive for some processes, none or paradoxical for others | Up to 29% of variation in mortality due to coding biases                                                                      |
| Thomas [57] 1991                                   | 42 US hospitals                                                                                                           | Cardiac surgery; AMI; pneumonia; arrhythmia; pelvic and femur fractures                                                | Percentage of cases in each hospital considered by Peer Review Organization review to have quality problems                                   | Condition-specific hospital mortality ratios; study unavailable for further information            | Statistically significant correlations for cardiac surgery, AMI and pneumonia, but not arrhythmias and fractures.                                                                                                                                                                                                         | Intuitive for some conditions, none for others               | Report unavailable (details from review) but frequency of quality problems not necessarily indicative of severity of problems |
| Thomas [58] 1993                                   | Between 9 and 33 hospitals in Minneapolis (depending on condition being correlated)                                       | Between 1,424 and 8,618 patients with ischaemic heart disease, (including angina, AMI and cardiac surgery), septicemia | Quality of care judgements by peer-review organisation reviewers                                                                              | In-hospital mortality; calculated from administrative data, predictive power not assessed          | Significant correlation between mortality and quality problem rate for angina, cardiac surgery and AMI; no association for septicemia                                                                                                                                                                                     | Intuitive for some conditions, none for others               | Process measured in 1986-7 and 1987-90, mortality measured 1987-8                                                             |
| Todd [59] 1992                                     | Eight hospitals in England in 1992                                                                                        | 580 orthopaedic patients aged over 60 years with hip fracture                                                          | Timing of surgery and mobilisation, prevention of thromboembolism, geriatrician assessment, use of antibiotics, pressure sore risk assessment | 90-day mortality; calculated from clinical data, predictive power not assessed                     | Significant differences between processes in different hospitals but little variation in outcomes. One hospital had a significantly lower mortality rate than the others and overall care was better than some of the others though no single process could be identified to account for this.                            | Intuitive or none (†)                                        | Study repeated by Freeman [42] in 1997 using nine hospitals, seven of which were in the original 1992 study                   |
| Uphold [60] 2005                                   | 30-34 US hospitals – public, not-for-profit private, for-profit private and VA                                            | 1,231 HIV positive patients with PCP, 750 HIV positive patients with community-acquired pneumonia                      | Timely use of antimicrobial medications and corticosteroids, intubation rates, isolation room, bronchoscopy, chest X-ray utilisation          | In-hospital mortality; calculated from clinical data, predictive power not assessed                | Rates of bronchoscopy and isolation varied across different categories of hospitals; timeliness of PCP treatments were similar and timelines of community-acquired pneumonia treatment was slower at not-for-profit hospitals than other types of hospitals. Mortality rates were similar across all types of hospitals.  | None                                                         |                                                                                                                               |
| Walker [61] 1988                                   | Five Jamaican hospitals                                                                                                   | 1,537 dehydrated infants under five                                                                                    | Level of adherence to 26 processes of care                                                                                                    | In-hospital, standardised according to dehydration severity from clinical data                     | Mortality higher in hospitals not conforming to standards of satisfactory care                                                                                                                                                                                                                                            | Intuitive                                                    | Each process measure had equal weighting attached                                                                             |
| Weir [62] 2001                                     | Five hospitals in Scotland                                                                                                | 2,724 stroke patients                                                                                                  | Adherence to Royal College of Physicians' Stroke Audit Form processes of care                                                                 | 6-month mortality; calculated from clinical data, predictive power assessed by c-statistic and ROC | One hospital with no specialised stroke service and few patients undergoing CT had much higher mortality than the others. Moderate care differences in other hospitals failed to affect mortality                                                                                                                         | Intuitive or none (†)                                        | Investigators not blinded<br>Possible systematic difference in how data in non-stroke unit was collected compared to others   |
| Williams [63] 1979                                 | 504 hospitals in California                                                                                               | 3,441,996 neonates(over 20 weeks gestation up to 28 days post-parturition)                                             | Standards of neonatal intensive care; survey of maternity unit practices                                                                      | Perinatal; calculated from administrative data, predictive power not assessed                      | Perinatal mortality lower in hospitals with higher specialist-to-generalist physician ratios and routinely measure Apgar scores                                                                                                                                                                                           | Intuitive                                                    | Deaths in 1960 and 1965-1073; Process survey in 1967                                                                          |

(†) In these studies there would have been no correlation between quality of care and mortality had it not been for the existence of one outlier hospital.
